# Supplementary material for: Carbon doping of WS2 monolayers: Bandgap reduction and p-type doping transport
Source: PubMed Central journal article supplement — Sci Adv. 2019 May 24;5(5):eaav5003. doi: 10.1126/sciadv.aav5003 (PMC6534391; doi:10.1126/sciadv.aav5003), 2019-05-24
Supplement: aav5003_SM.pdf [file aav5003_SM.pdf]

## Supplementary Materials for

### Carbon doping of WS<sub>2</sub> monolayers: Bandgap reduction and p-type doping transport

Fu Zhang, Yanfu Lu, Daniel S. Schulman, Tianyi Zhang, Kazunori Fujisawa, Zhong Lin, Yu Lei, Ana Laura Elias, Saptarshi Das\*, Susan B. Sinnott\*, Mauricio Terrones\*

\*Corresponding author. Email: mut11@psu.edu (M.T.); sbs5563@psu.edu (S.B.S.); sud70@psu.edu (S.D.)

Published 24 May 2019, *Sci. Adv.* **5**, eaav5003 (2019)  
DOI: 10.1126/sciadv.aav5003

#### This PDF file includes:

- Fig. S1. PL responses of reference samples.
- Fig. S2. PL mapping of carbon-doped WS<sub>2</sub>, Raman and PL of heavily carbon-doped WS<sub>2</sub>.
- Fig. S3. XPS analyses of the carbon-doped WS<sub>2</sub>.
- Fig. S4. VBM spectra of the carbon-doped WS<sub>2</sub>.
- Fig. S5. UV-vis spectra of the carbon-doped WS<sub>2</sub>.
- Fig. S6. Complementary band structures and DOS of monolayer pristine WS<sub>2</sub> and carbon-doped WS<sub>2</sub>.
- Fig. S7. Experimental STEM examples and identification of sulfur monovacancies and carbon dopant in pristine and carbon-doped WS<sub>2</sub> monolayers.
- Fig. S8. Band diagram showing the change in Fermi level pinning.
- Fig. S9. Transfer and output characteristics of a carbon-doped WS<sub>2</sub>-based FET (@8 sccm CH<sub>4</sub>).
- Table S1. Local strain of WS<sub>2</sub> with premade single vacancies and different ligands on C atoms and dopant positions.

## Supplementary Materials

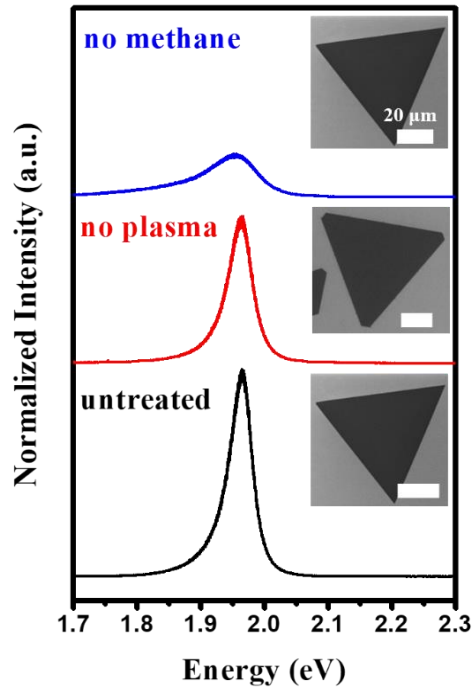

**Fig. S1. PL responses of reference samples.** Pristine WS<sub>2</sub> (bottom), WS<sub>2</sub> annealed at 400°C in a CH<sub>4</sub> environment (middle), and Ar/H<sub>2</sub> plasma treated WS<sub>2</sub> in the absence of CH<sub>4</sub> (top). As CH<sub>4</sub> cannot be thermally decomposed at 400°C in the absence of plasma, the spectra from heat treated and pristine samples are very similar. Ar/H<sub>2</sub> plasma treatment (without CH<sub>4</sub>) causes sulfur atoms to be sputtered away from WS<sub>2</sub>, therefore the top panel shows both a quenching and a defect related shoulder in the PL response, as expected. In all panels, insets exhibit the corresponding scanning electron microscopy (SEM) images of the WS<sub>2</sub>, showing no morphology changes among these three different samples.

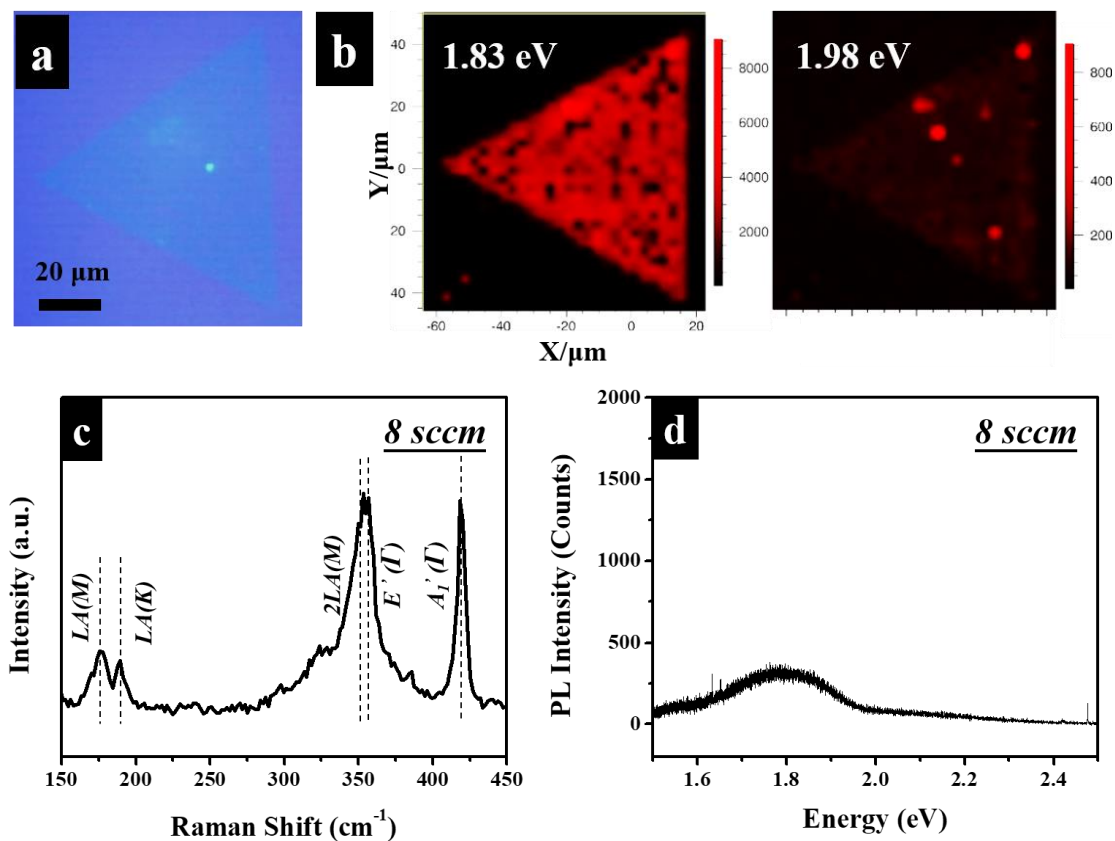

**Fig. S2. PL mapping of carbon-doped WS<sub>2</sub>, Raman and PL of heavily carbon-doped WS<sub>2</sub>.** (a) and (b) show the uniformity of the PL of the carbon-doped WS<sub>2</sub> @ 5sccm, measured with a 488 nm laser. (a) Optical image of a WS<sub>2</sub> triangular monolayer. (b) PL mappings showing the intensity of the response at 1.83 eV and 1.98eV, respectively. The mapping at 1.83 exhibits a mostly uniform PL signal, with the exception a few areas with local structural defects (such as holes in the triangles) or undoped parts (that emit at 1.98 eV). **(c) Raman and (d) PL of heavily-carbon-doped WS<sub>2</sub> (@ 8sccm).** Extra carbon doping may result in severe PL quenching but the characteristic Raman signatures of WS<sub>2</sub> are preserved.

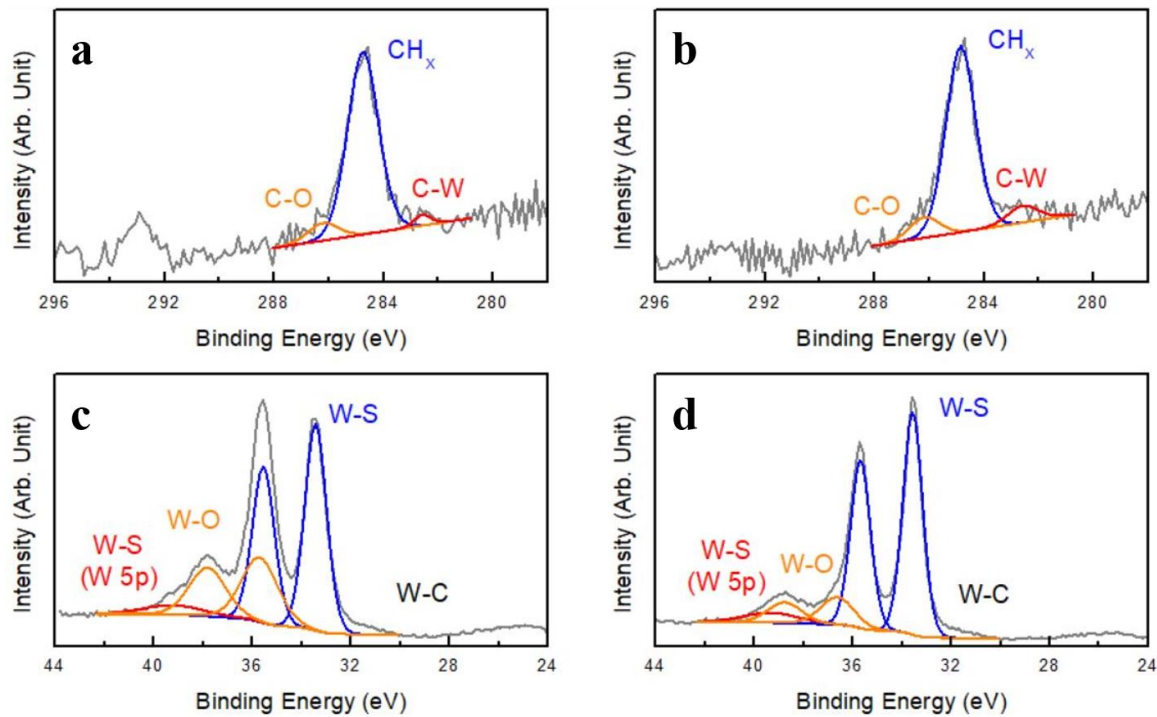

| at. %    | Si   | O    | S    | W as WS <sub>2</sub> | W as WO <sub>3</sub> | C    | C as W-C | C in WS <sub>2</sub> |
|----------|------|------|------|----------------------|----------------------|------|----------|----------------------|
| Pristine | 23.5 | 50.0 | 11.1 | 4.9                  | 2.1                  | 8.0  | 0.22     | 1.98                 |
| Doped    | 21.9 | 43.2 | 15.0 | 8.0                  | 1.3                  | 10.4 | 0.80     | 5.33                 |

**Fig. S3. XPS analyses of the carbon-doped WS<sub>2</sub>.** X-ray photoelectron spectroscopy (XPS) elemental analyses of pristine WS<sub>2</sub> (a) C 1s, (c) W 4f, and carbon-doped WS<sub>2</sub> (b) C 1s and (d) W 4f core levels. The table list shows elemental compositions in both the pristine and carbon-doped WS<sub>2</sub>. The carbon exists on the material surface mostly in the form of CH<sub>x</sub> and CO<sub>x</sub> (intense peak centered at ~ 284.8 eV). The C 1s line scans show that the carbon in the form of carbide bonding (red curve at around 282.5 eV) increased three times after doping, which indicates the formation of the new W-C bonds that substitute sulfur atoms in the WS<sub>2</sub> lattice. We have also characterized and compared the pristine WS<sub>2</sub> and carbon-doped WS<sub>2</sub> samples by ToF-SIMS (Time of Flight Secondary Ion Mass Spectrometry), and FTIR (Fourier Transform Infrared Spectroscopy). The low signal to noise ratio lead to difficulties in detecting the characteristic features from doped carbon species.

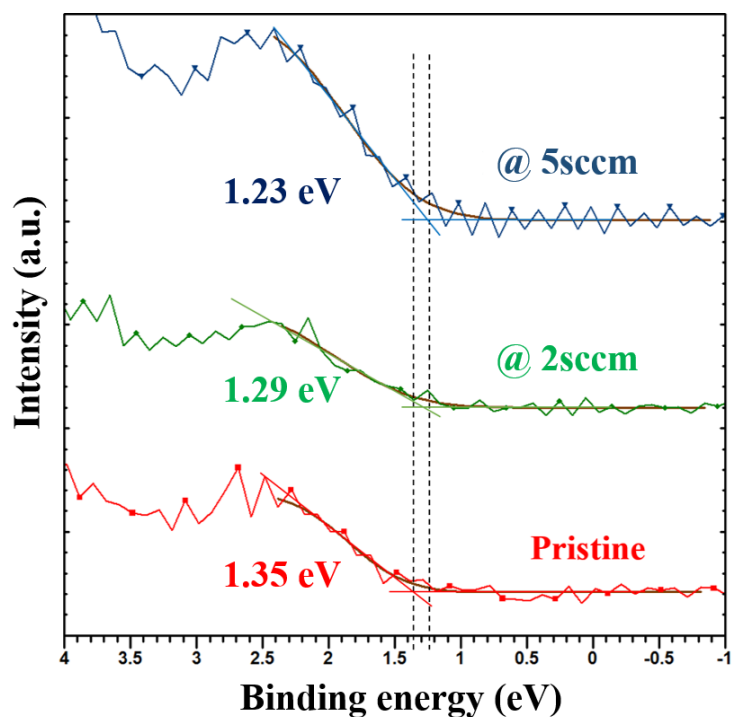

**Fig. S4. VBM of the carbon-doped WS<sub>2</sub>.** The carbon incorporation into WS<sub>2</sub> gradually saturates the sulfur vacancies, thus decreasing the energy of the valence band maximum (VBM) to the Fermi level (FL), as shown in the figure, from 1.35 eV (pristine) to 1.29 eV (doped @2 sccm) and 1.23 eV (doped @5 sccm). All three spectra show similar valence band signatures of WS<sub>2</sub> that indicate that the binding energy shift was induced by carbon doping in WS<sub>2</sub>.

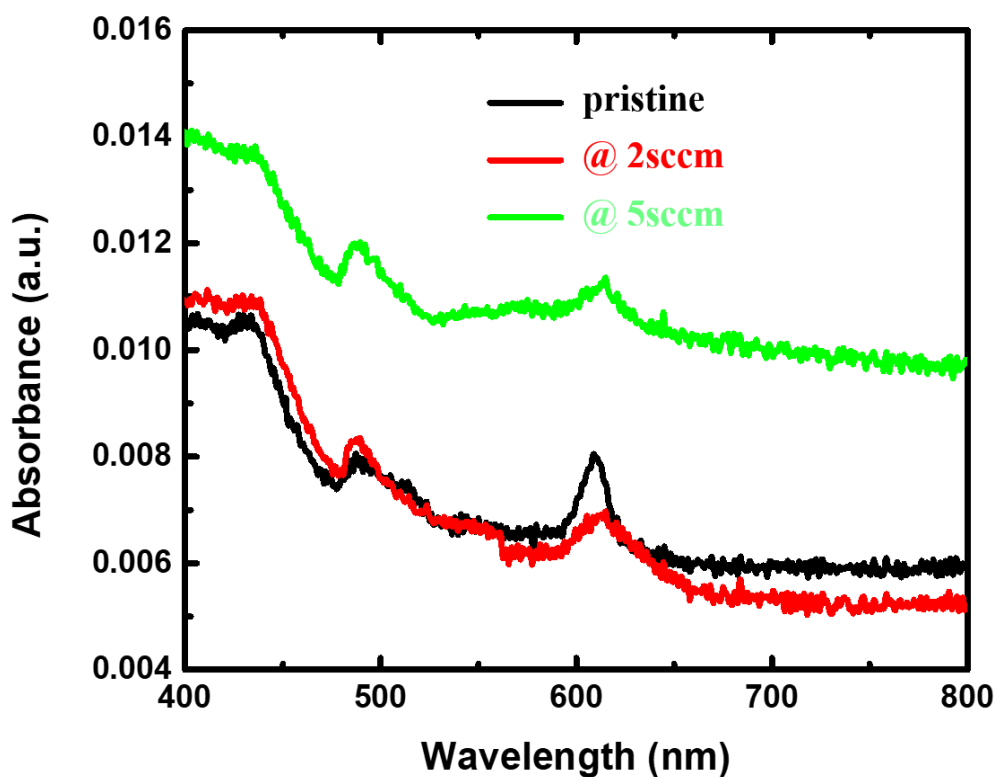

**Fig. S5. UV-Vis spectra of the carbon-doped WS<sub>2</sub>.** The A exciton can be observed at 608 nm (2.039 eV) in the as grown WS<sub>2</sub>, which corresponds to the excitonic absorption at the K point of the Brillouin zone. This is one of the characteristic absorption peaks of the monolayered WS<sub>2</sub>. As the percentage of C in WS<sub>2</sub> increases, the A excitonic transition gradually shifts from 2.039 eV (608 nm) to 2.020 eV (614 nm) in lightly-doped WS<sub>2</sub> (@2 sccm), and 2.016 eV (615 nm) in medium-doped WS<sub>2</sub>(@5 sccm). The red shifts in the A excitonic transitions further support the bandgap reduction via C doping.

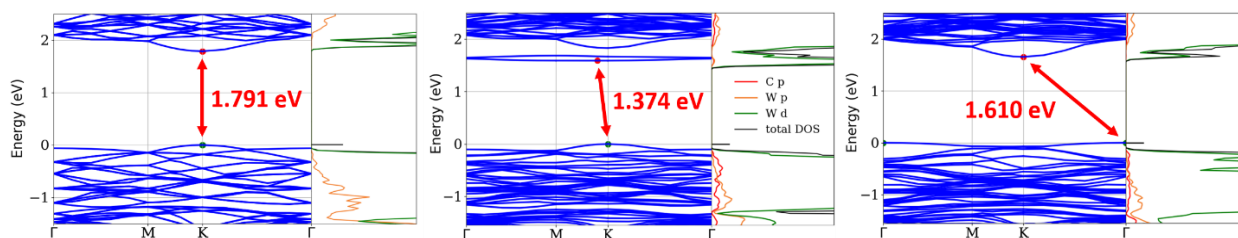

**Fig. S6. Complementary band structures and DOS of monolayer pristine WS<sub>2</sub> and carbon-doped WS<sub>2</sub>.** Band structure and density of states (DOS) of (a) monolayer pristine WS<sub>2</sub>, (b) carbon-doped WS<sub>2</sub> with CH<sub>2</sub> units bonded at the  $\beta$  position of the single sulfur vacancy, and (c) CH<sub>2</sub>-doped WS<sub>2</sub> with the dopant at the  $\alpha$  position. In the DOS, p-orbitals of C and W atoms, d-orbital of W atoms, and total DOS are plotted in different colors.

Pristine  $\text{WS}_2$

a

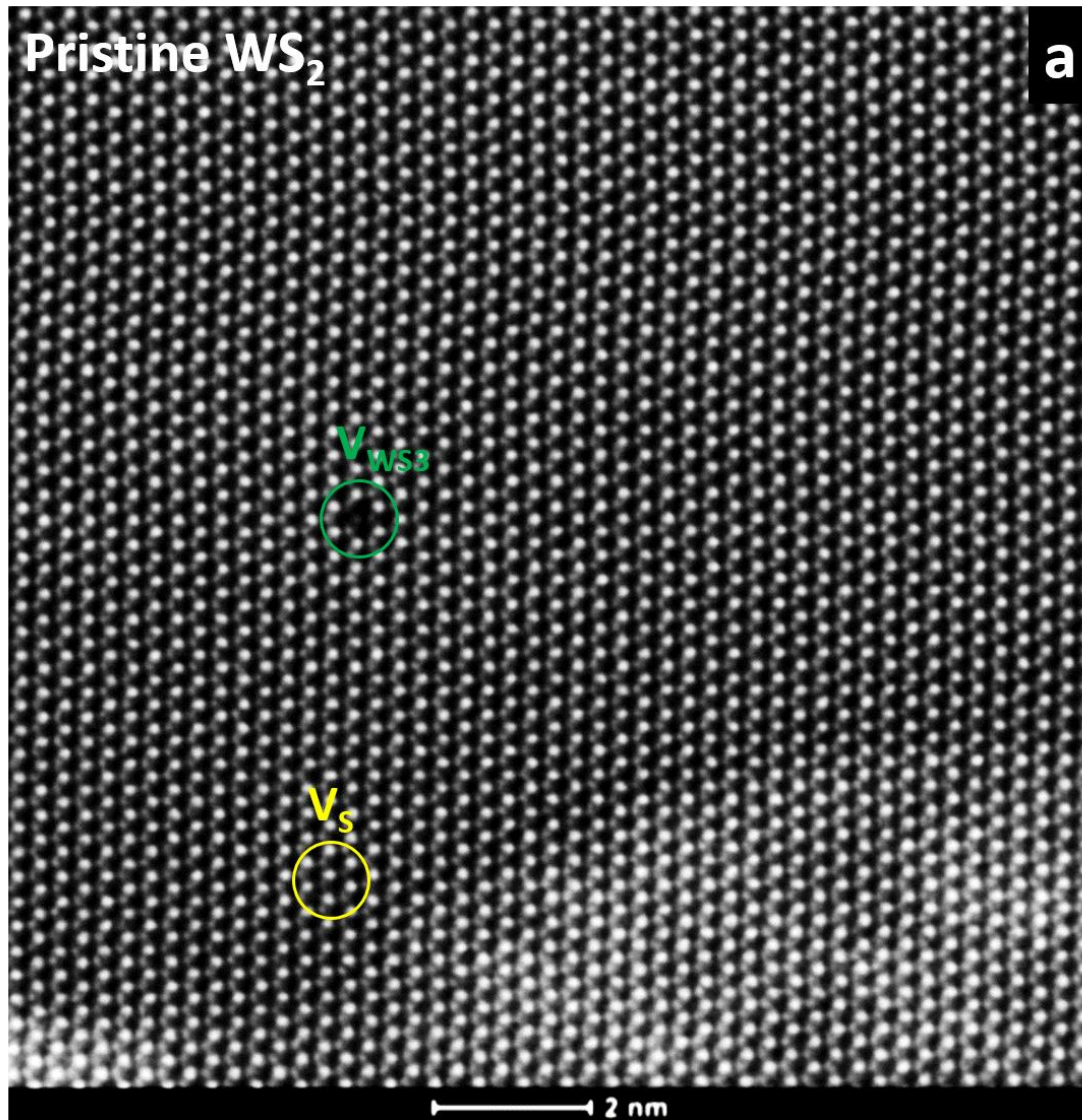



C-doped #1

b

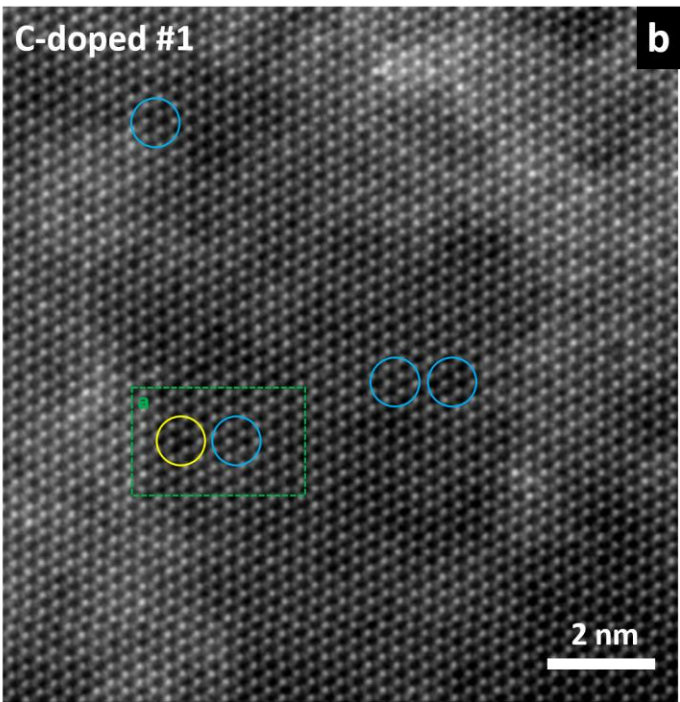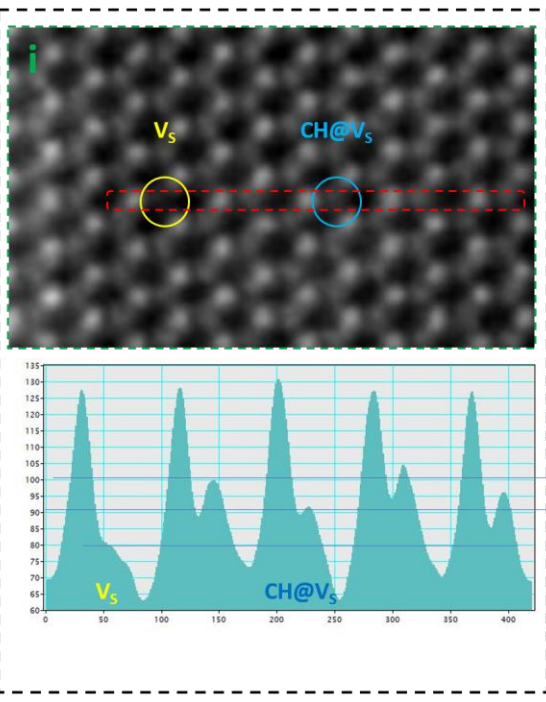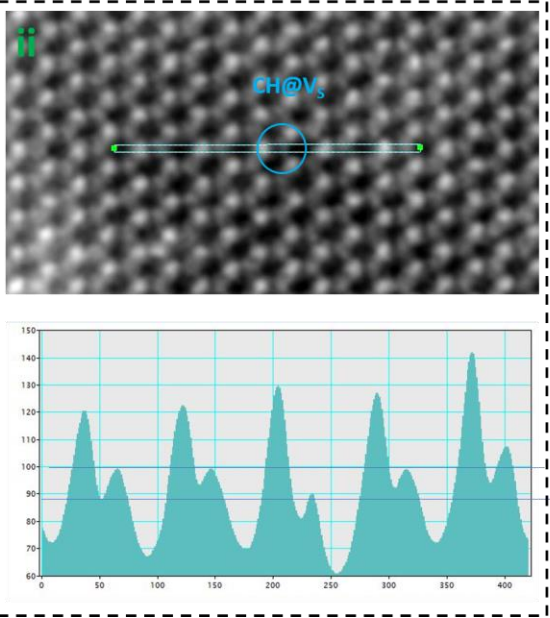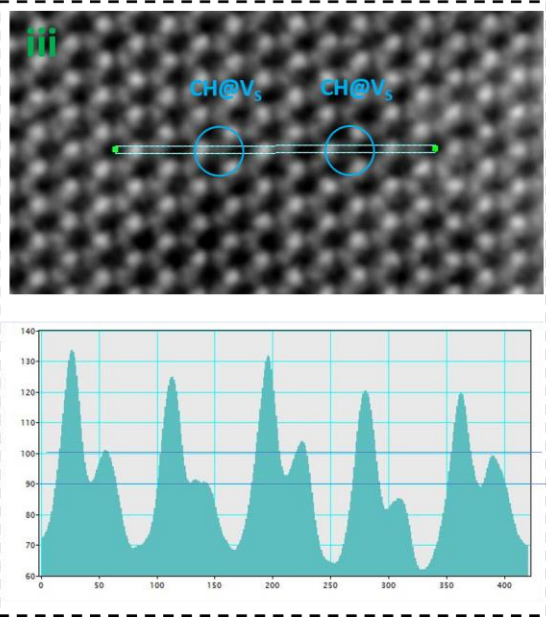



C-doped #2

c

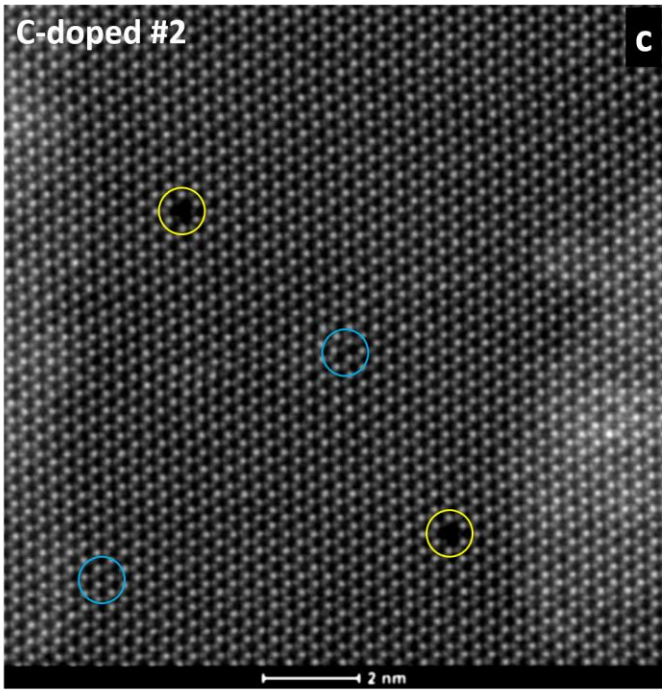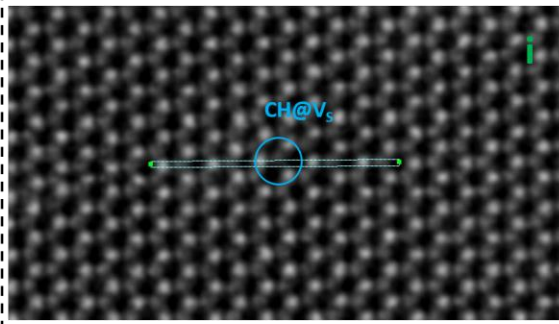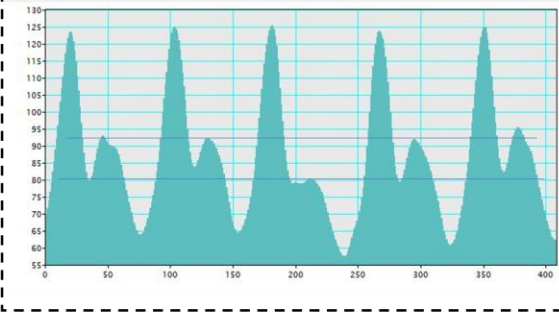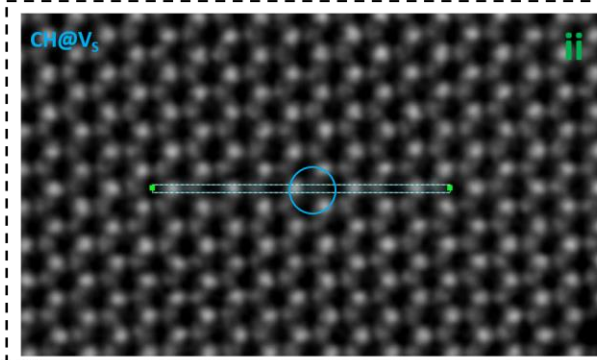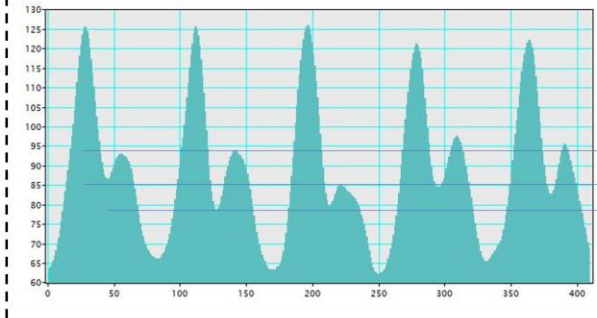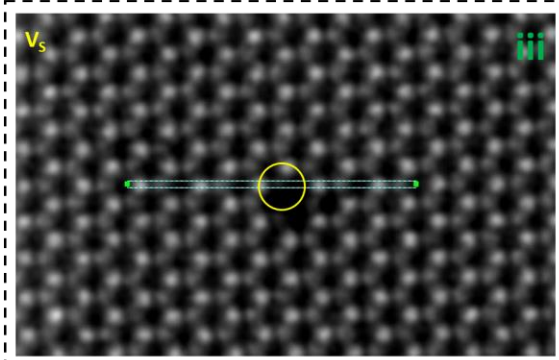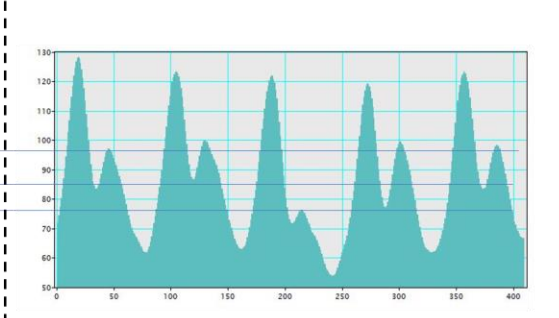

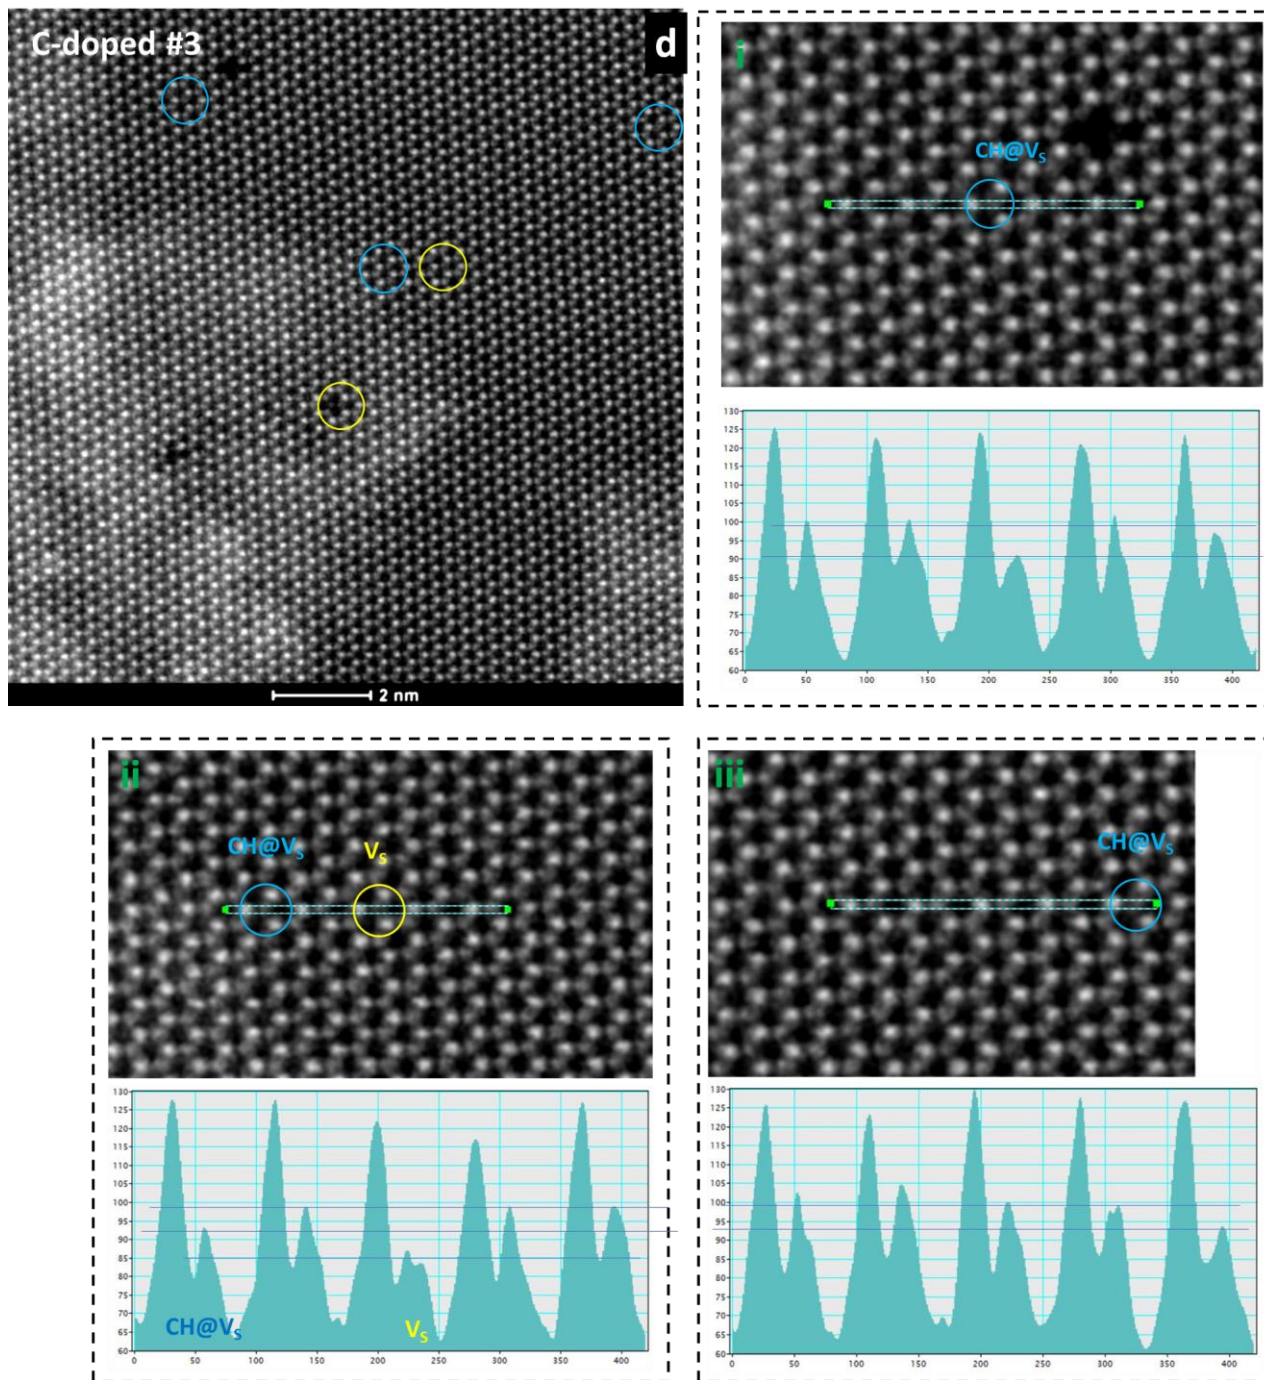

**Fig. S7. Experimental STEM examples and identification of sulfur monovacancies and carbon dopant in pristine and carbon-doped WS<sub>2</sub> monolayers.** A single sulfur vacancy (Vs) is highlighted with a yellow circle, and tungsten vacancies (V<sub>WS3</sub>) with green circles. The hexagonal WS<sub>2</sub> lattice can also be identified from the ADF intensity. **Examples of carbon-doped WS<sub>2</sub> monolayers** (b-d) showing the CH@Vs (blue circles) and Vs defects (yellow circles) identified by the ADF image intensity. The line profiles clearly show differences in the intensities when comparing CH@Vs and Vs. We made sure that this intensity profile line-scan avoid the contaminated polymer residue regions by only analyzing atomically clean areas.

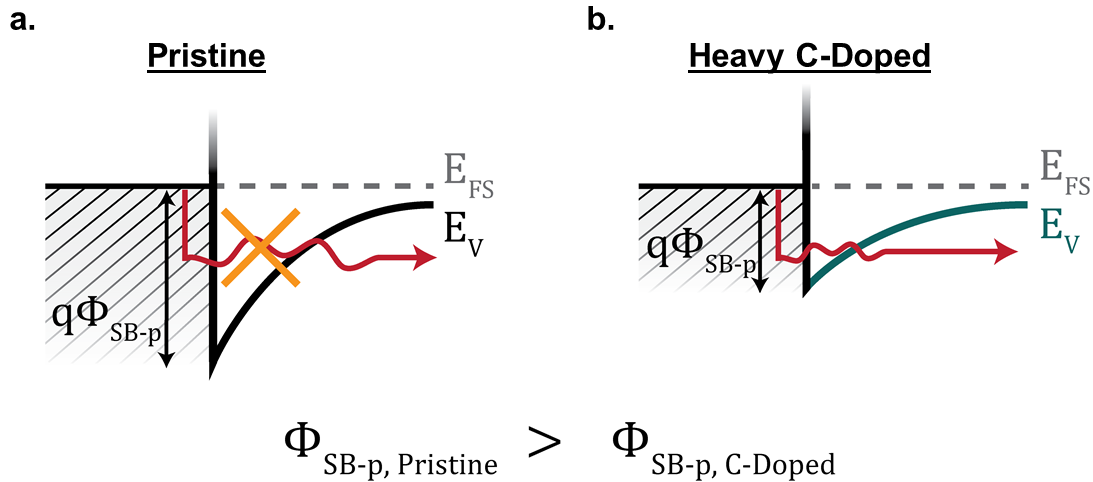

**Fig. S8. Band diagram showing the change in Fermi level pinning.** Schematic of the valence band position ( $E_V$ ) near the source for a (a) pristine and (b) carbon-doped FET (@ 8sccm), respectively. For the pristine devices, a tall and wide Schottky tunnel barrier ( $\Phi_{\text{SB-p}}$ ) prevents any hole conduction and hence no p-branch is observed. Conversely, after heavy doping (@ 8sccm), the metal Fermi level pins closer to the  $\text{WS}_2$  valence band. Thus, heavily-doped samples have a smaller Schottky barrier height for hole injection and, therefore, exhibit significant hole conduction.

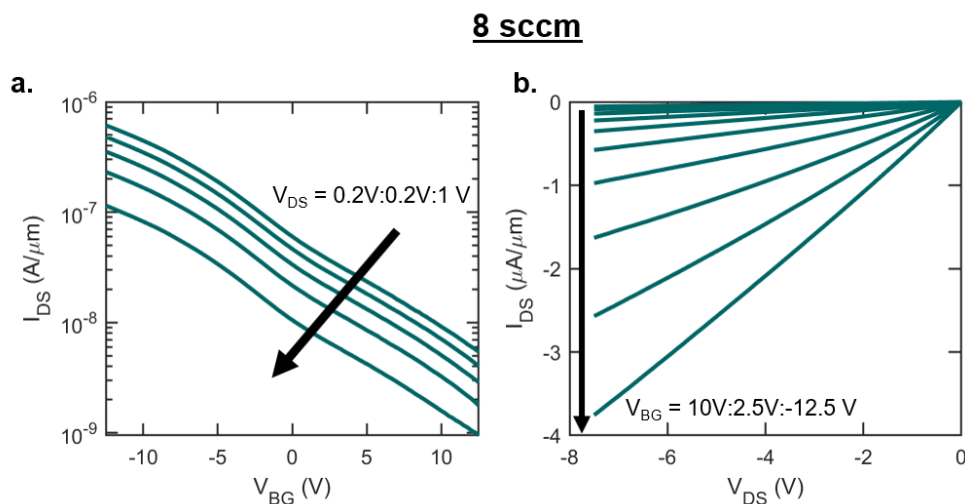

**Fig. S9. Transfer and output characteristics of a carbon-doped  $\text{WS}_2$ -based FET (@8 sccm  $\text{CH}_4$ ).** (a) Drain current ( $I_{\text{DS}}$ ) versus back gate voltage ( $V_{\text{BG}}$ ) and (b)  $I_{\text{DS}}$  versus drain voltage ( $V_{\text{DS}}$ ). The device shows heavy p-doping and linear  $I_{\text{DS}}$  versus  $V_{\text{DS}}$  characteristics, indicating the metal- $\text{WS}_2$  Fermi level is pinned relatively close to the valence band.

**Table S1. Local strain of WS<sub>2</sub> with premade single vacancies and different ligands on C atoms and dopant positions.** The local strain is compared to pristine WS<sub>2</sub>.

| Premade Vacancy Type | Type of Dopant  | Strain Compared to Pristine WS <sub>2</sub> |         |          |
|----------------------|-----------------|---------------------------------------------|---------|----------|
|                      |                 | Doped C Position                            |         |          |
|                      |                 | $\alpha$                                    | $\beta$ | $\gamma$ |
| Single Vacancy       | C               | -0.21%                                      | -0.24%  | 0.50%    |
|                      | CH              | -0.43%                                      | -0.10%  | 0.53%    |
|                      | CH <sub>2</sub> | -0.32%                                      | -0.11%  | 0.74%    |
